# Supplementary material
Source: PubMed Central journal article supplement (PMC2612454)

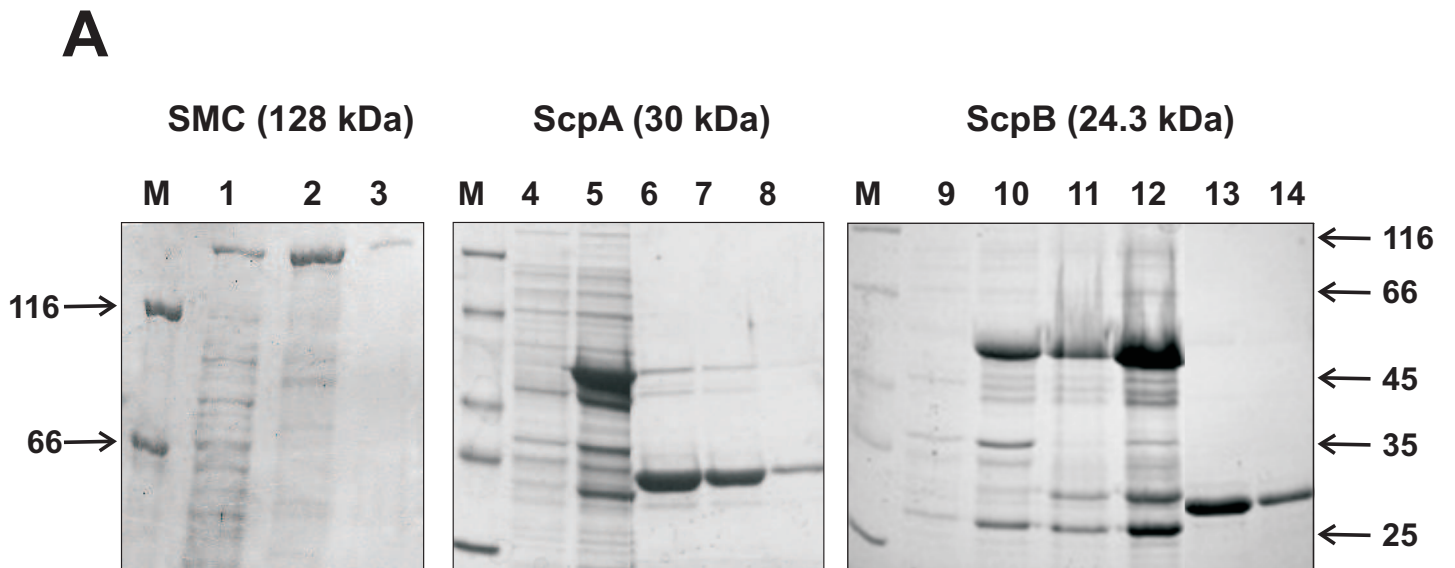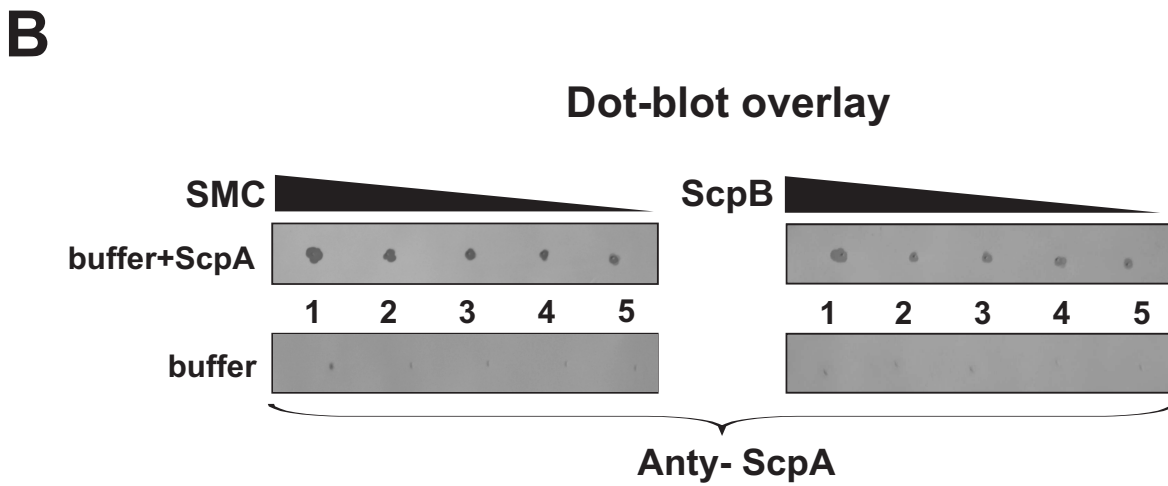

Fig. S1 Kois *et al.*, 2008

Supplement: supp_191_1_310__1.pdf [file supp_191_1_310__1.pdf]
